# Supplementary material
Source: PubMed Central journal article supplement (PMC3219051)
Supplement: supp_en.2010-0959_en-10-0959_fig_1.pdf [file supp_en.2010-0959_en-10-0959_fig_1.pdf]

## Supplemental Figure 1

**A**

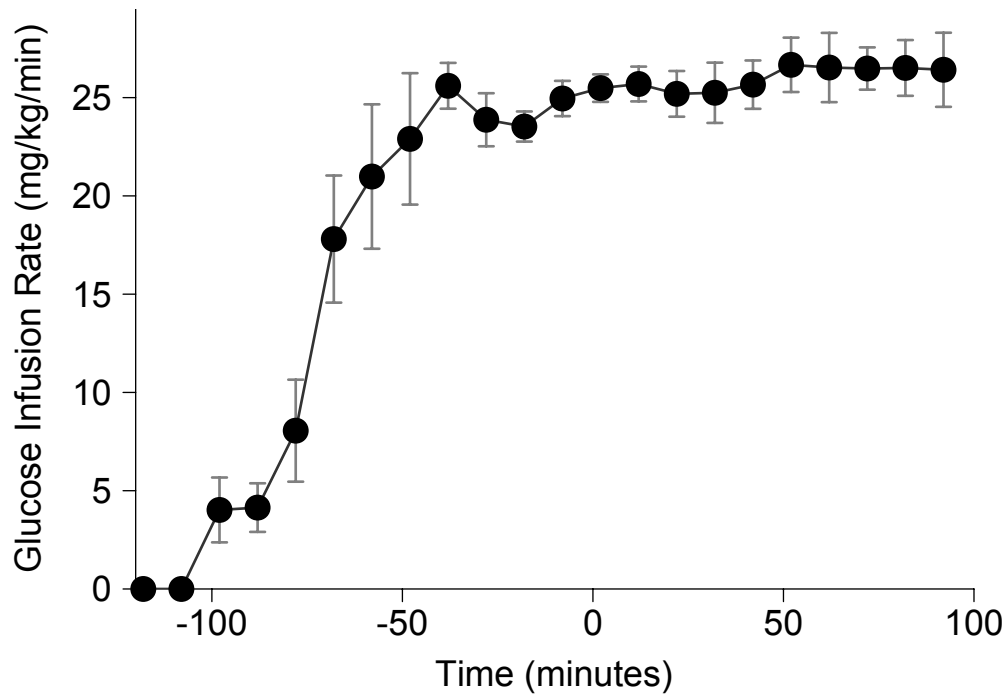

**B**

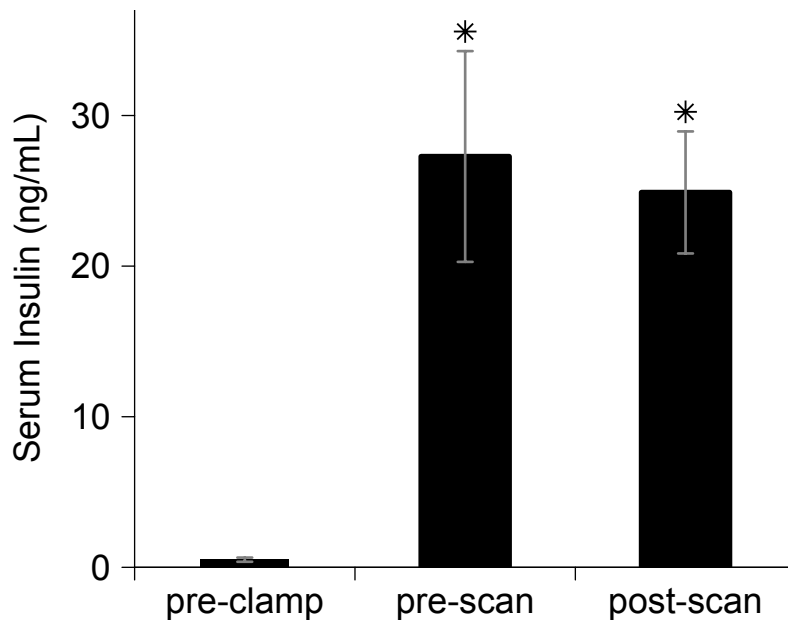

**(A)** Glucose infusion rate during euglycemic hyperinsulinemic clamp. Insulin infusion was initiated  $98 \pm 3$  min prior to infusion of FDG at time 0. **(B)** Serum insulin was measured prior to initiation of the clamp (pre-clamp), just prior to the infusion of FDG at time 0 (pre-scan), and at the conclusion of the PET imaging (post-scan).
